# Supplementary material
Source: MDPI journal article supplement (https://www.mdpi.com/1424-2818/14/9/709)
Supplement: s1 [file s1]

**Table S1.** The material of *M. hartingi* that is used in the article.

|               |                         |                             |   |     |
|---------------|-------------------------|-----------------------------|---|-----|
| ZIN 84905-159 | <i>M.h.strandzensis</i> | Gramatikovo, Bulgaria       | f | ad  |
| ZIN 84905-283 | <i>M.h.strandzensis</i> | Gramatikovo, Bulgaria       | f | ad  |
| ZIN 84905-308 | <i>M.h.strandzensis</i> | Gramatikovo, Bulgaria       | f | ad  |
| ZIN 84905-327 | <i>M.h.strandzensis</i> | Gramatikovo, Bulgaria       | f | ad  |
| ZIN 84905-336 | <i>M.h.strandzensis</i> | Gramatikovo, Bulgaria       | f | ad  |
| ZIN 84905-339 | <i>M.h.strandzensis</i> | Gramatikovo, Bulgaria       | f | ad  |
| ZIN 84905-457 | <i>M.h.strandzensis</i> | Gramatikovo, Bulgaria       | f | ad  |
| ZIN 84905-459 | <i>M.h.strandzensis</i> | Gramatikovo, Bulgaria       | f | ad  |
| ZIN 84905-460 | <i>M.h.strandzensis</i> | Gramatikovo, Bulgaria       | f | ad  |
| ZIN 84905-10  | <i>M.h.strandzensis</i> | Gramatikovo, Bulgaria       | m | ad  |
| ZIN 84905-161 | <i>M.h.strandzensis</i> | Gramatikovo, Bulgaria       | m | ad  |
| ZIN 84905-163 | <i>M.h.strandzensis</i> | Gramatikovo, Bulgaria       | m | ad  |
| ZIN 84905-166 | <i>M.h.strandzensis</i> | Gramatikovo, Bulgaria       | m | ad  |
| ZIN 84905-206 | <i>M.h.strandzensis</i> | Gramatikovo, Bulgaria       | m | ad  |
| ZIN 84905-243 | <i>M.h.strandzensis</i> | Gramatikovo, Bulgaria       | m | ad  |
| ZIN 84905-310 | <i>M.h.strandzensis</i> | Gramatikovo, Bulgaria       | m | ad  |
| ZIN 84911-340 | <i>M.h.strandzensis</i> | Gramatikovo, Bulgaria       | f | ad  |
| ZIN 84911-383 | <i>M.h.strandzensis</i> | Gramatikovo, Bulgaria       | f | ad  |
| ZIN 84911-408 | <i>M.h.strandzensis</i> | Gramatikovo, Bulgaria       | f | ad  |
| ZIN 84911-464 | <i>M.h.strandzensis</i> | Gramatikovo, Bulgaria       | f | ad  |
| ZIN 84911-465 | <i>M.h.strandzensis</i> | Gramatikovo, Bulgaria       | f | ad  |
| ZIN 84911-468 | <i>M.h.strandzensis</i> | Gramatikovo, Bulgaria       | f | ad  |
| ZIN 84911-166 | <i>M.h.strandzensis</i> | Gramatikovo, Bulgaria       | m | ad  |
| ZIN 84911-208 | <i>M.h.strandzensis</i> | Gramatikovo, Bulgaria       | m | ad  |
| ZIN 84911-245 | <i>M.h.strandzensis</i> | Gramatikovo, Bulgaria       | m | ad  |
| ZIN 84911-302 | <i>M.h.strandzensis</i> | Gramatikovo, Bulgaria       | m | ad  |
| ZIN 84911-310 | <i>M.h.strandzensis</i> | Gramatikovo, Bulgaria       | m | ad  |
| ZIN 84911-375 | <i>M.h.strandzensis</i> | Gramatikovo, Bulgaria       | m | ad  |
| ZIN 84911-466 | <i>M.h.strandzensis</i> | Gramatikovo, Bulgaria       | m | ad  |
| ZIN 84911-467 | <i>M.h.strandzensis</i> | Gramatikovo, Bulgaria       | m | ad  |
| ZIN 84912-445 | <i>M.h.strandzensis</i> | Gramatikovo, Bulgaria       | m | 1y  |
| ZIN 84912-191 | <i>M.h.strandzensis</i> | Gramatikovo, Bulgaria       | f | ad  |
| ZIN 84912-291 | <i>M.h.strandzensis</i> | Gramatikovo, Bulgaria       | f | ad  |
| ZIN 84912-600 | <i>M.h.strandzensis</i> | Gramatikovo, Bulgaria       | f | ad  |
| ZIN 84912-601 | <i>M.h.strandzensis</i> | Gramatikovo, Bulgaria       | f | ad  |
| ZIN 84912-605 | <i>M.h.strandzensis</i> | Gramatikovo, Bulgaria       | f | ad  |
| ZIN 84912-434 | <i>M.h.strandzensis</i> | Gramatikovo, Bulgaria       | m | ad  |
| ZIN 84912-525 | <i>M.h.strandzensis</i> | Gramatikovo, Bulgaria       | m | ad  |
| ZIN 84912-602 | <i>M.h.strandzensis</i> | Gramatikovo, Bulgaria       | m | ad  |
| ZIN 84912-603 | <i>M.h.strandzensis</i> | Gramatikovo, Bulgaria       | m | ad  |
| ZIN 84912-604 | <i>M.h.strandzensis</i> | Gramatikovo, Bulgaria       | m | ad  |
| S-35380       | <i>M.h.hartingi</i>     | Larissa, Greece             | f | ad  |
| S-35380       | <i>M.h.hartingi</i>     | Thessaly, Greece            | f | ad  |
| AUMAC 2349    | <i>M.h.ankaensis</i>    | Kırşehir, Turkey            | m | ad  |
| AUMAC 4157    | <i>M.h.ankaensis</i>    | Kırşehir, Turkey            | m | ad  |
| AUMAC 1641    | <i>M.h.ankaensis</i>    | Gümüşoluk, Ankara, Turkey   | m | ad  |
| AUMAC 2551    | <i>M.h.ankaensis</i>    | Kırıkkale, Turkey           | m | sad |
| AUMAC 2752    | <i>M.h.ankaensis</i>    | Kırıkkale, Turkey           | f | ad  |
| AUMAC 1616    | <i>M.h.ankaensis</i>    | Bala, Ankara, Turkey        | m | ad  |
| AUMAC 2050    | <i>M.h.ankaensis</i>    | Ankara, Turkey              | m | ad  |
| AUMAC 3253    | <i>M.h.ankaensis</i>    | Kurtboğazı , Turkey         | m | ad  |
| AUMAC 2968    | <i>M.h.ankaensis</i>    | Ankara, Turkey              | f | ad  |
| AUMAC 2476    | <i>M.h.ankaensis</i>    | Ankara, Turkey              | f | ad  |
| AUMAC 3954    | <i>M.h.ankaensis</i>    | Kurtboğazı , Ankara, Turkey | m | ad  |
| AUMAC 2001    | <i>M.h.ankaensis</i>    | Ankara, Turkey              | f | sad |

|               |                               |                             |   |     |
|---------------|-------------------------------|-----------------------------|---|-----|
| AUMAC 2043    | <i>M.h.ankaensis</i>          | Ankara, Turkey              | m | sad |
| AUMAC 2352    | <i>M.h.ankaensis</i>          | Ankara, Turkey              | f | ad  |
| AUMAC 1675    | <i>M.h.ankaensis</i>          | Ankara, Turkey              | - | ad  |
| AUMAC 1814    | <i>M.h.ankaensis</i>          | Ankara, Turkey              | m | ad  |
| AUMAC 1644    | <i>M.h.ankaensis</i>          | Ankara, Turkey              | m | ad  |
| AUMAC 1816    | <i>M.h.ankaensis</i>          | Ankara, Turkey              | m | ad  |
| AUMAC 1906    | <i>M.h.ankaensis</i>          | Ankara, Turkey              | m | sen |
| AUMAC 1980    | <i>M.h.ankaensis</i>          | Ankara, Turkey              | m | sen |
| AUMAC 1904    | <i>M.h.ankaensis</i>          | Polatlı , Ankara, Turkey    | m | ad  |
| AUMAC 3595    | <i>M.h.ankaensis</i>          | Ankara, Turkey              | m | ad  |
| AUMAC 3249    | <i>M.h.ankaensis</i>          | Kurtboğazi , Ankara, Turkey | f | ad  |
| AUMAC 1617    | <i>M.h.ankaensis</i>          | Ankara, Turkey              | m | ad  |
| AUMAC 1416    | <i>M.h.ankaensis</i>          | Ankara, Turkey              | f | ad  |
| AUMAC 2042    | <i>M.h.ankaensis</i>          | Ankara, Turkey              | f | ad  |
| AUMAC 1618    | <i>M.h.ankaensis</i>          | Bala, Ankara, Turkey        | f | ad  |
| AUMAC 1979    | <i>M.h.ankaensis</i>          | Ankara, Turkey              | f | ad  |
| AUMAC 3014    | <i>M.h.lydius</i>             | Beysehir, Turkey            | m | ad  |
| AUMAC 3509    | <i>M.h.lydius</i>             | Karacabey , Bursa, Turkey   | f | ad  |
| AUMAC 2789    | <i>M.h.lydius</i>             | Gömü, Afyon, Turkey         | f | sad |
| AUMAC 3538    | <i>M.h.lydius</i>             | Gömü, Afyon, Turkey         | m | ad  |
| AUMAC 3520    | <i>M.h.lydius</i>             | Gömü, Afyon, Turkey         | m | ad  |
| AUMAC 3477    | <i>M.h.lydius</i>             | Gömü, Afyon, Turkey         | f | ad  |
| AUMAC 2792    | <i>M.h.lydius</i>             | Gömü, Afyon, Turkey         | m | ad  |
| AUMAC 3522    | <i>M.h.lydius</i>             | Gömü, Afyon, Turkey         | f | ad  |
| AUMAC 2791    | <i>M.h.lydius</i>             | Gömü, Afyon, Turkey         | f | ad  |
| AUMAC 3521    | <i>M.h.lydius</i>             | Gömü, Afyon, Turkey         | f | ad  |
| AUMAC 2923    | <i>M.h.lydius</i>             | Gömü, Afyon, Turkey         | m | ad  |
| AUMAC 3537    | <i>M.h.lydius</i>             | Gömü, Afyon, Turkey         | m | ad  |
| AUMAC 2511    | <i>M.h.lydius</i>             | Burdur, Turkey              | m | ad  |
| AUMAC 3207    | <i>M.h.lydius</i>             | Acıpayam, Denizli, Turkey   | m | ad  |
| AUMAC 3515    | <i>M.h.lydius</i>             | Talas, Denizli, Turkey      | m | ad  |
| AUMAC 3233    | <i>M.h.lydius</i>             | Acıpayam, Denizli, , Turkey | m | ad  |
| AUMAC 3136    | <i>M.h.lydius</i>             | Izmir, Turkey               | f | ad  |
| AUMAC 2550    | <i>M.h.lydius</i>             | Kemalpaşa , Izmir, Turkey   | m | ad  |
| ZIN 107168-2  | <i>M.hartingi</i> (Rhodopes)  | Mandrica, Bulgaria          | f | ad  |
| ZIN 107168-1  | <i>M. hartingi</i> (Rhodopes) | Mandrica, Bulgaria          | m | ad  |
| ZIN 107168-8  | <i>M. hartingi</i> (Rhodopes) | Mandrica, Bulgaria          | m | ad  |
| ZIN 107168-4  | <i>M. hartingi</i> (Rhodopes) | Mandrica, Bulgaria          | f | ad  |
| ZIN 107168-6  | <i>M. hartingi</i> (Rhodopes) | Mandrica, Bulgaria          | m | sad |
| ZIN 107168-7  | <i>M. hartingi</i> (Rhodopes) | Mandrica, Bulgaria          | m | ad  |
| ZIN 107168-5  | <i>M. hartingi</i> (Rhodopes) | Meden Buk, Bulgaria         | m | ad  |
| ZIN 107168-3  | <i>M. hartingi</i> (Rhodopes) | Meden Buk, Bulgaria         | m | ad  |
| ZIN 107168-9  | <i>M. hartingi</i> (Rhodopes) | Mandrica, Bulgaria          | m | ad  |
| ZIN 107168-10 | <i>M. hartingi</i> (Rhodopes) | Mandrica, Bulgaria          | m | ad  |
| ZIN 107168-11 | <i>M. hartingi</i> (Rhodopes) | Mandrica, Bulgaria          | m | ad  |
